# Supplementary material for: Model-based design of a wave-feedforward control strategy inﬂoating wind turbines
Source: Copernicus journal article supplement (doi:10.5194/wes-2021-9), 2021-03-01
Supplement: Supplementary file [file wes-2021-9-AC1-supplement.pdf]

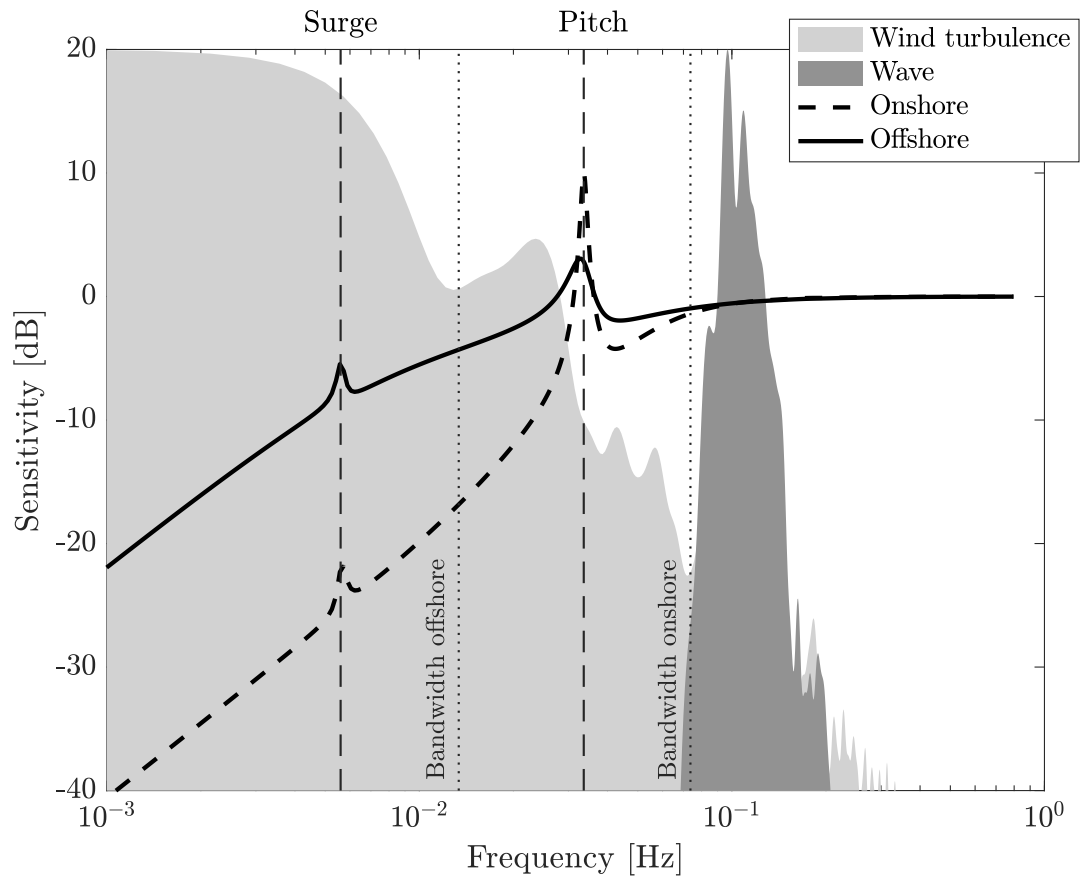

Figure 1: The sensitivity function of the blade-pitch feedback controller with original (Onshore) and detuned (Offshore) gains. In the background, it is shown the typical PSD of wind and waves, which magnitude has been rescaled to ease the comparison with sensitivity functions.
